# Supplementary material for: Microbiological findings in early and late implant loss: an observational clinical cohort study
Source: Research Square preprint supplement (doi:10.21203/rs.3.rs-58719/v2), 2020-12-09
Supplement: Supplementary file 1 [file 0ad33e8f45f0cf322c688b56.xlsx]

## Sheet: Tabelle1
sampleID	implantID	patientID	implant region	implant system	implant lenght in mm	implant diameter in mm	bone loss in mm	time since implant placement (years)	diabetes (0=no, 1=yes)	smoker (0=no, 1=yes)	antibiosis within 12 months (0=no, 1=yes)	regular mouthwash (0=no, 1=yes)	fixed denture (0=no, 1=yes, 2=planned)	periodontitis (0=no, 1=yes)	group
p05_26	05_26	05	26	Astra	11	4	7	5.5	0	0	0	0	1	0	L
p07_14	07_14	07	14	Astra	13	4.5	0	0.21	0	0	1	0	2	0	CE
p08_24	08_24	08	24	Astra	11	4.5	0	0.15	0	0	1	1	2	1	CE
p08_27	08_27	08	27	Astra	11	4	7	6	0	0	1	1	0	1	L
p08_37	08_37	08	37	Frialit2	15	4.5	10	22	0	0	1	1	0	1	L
p13_37	13_37	13	37	Astra	11	5	0	4.5	0	0	1	1	1	1	CL
p14_12	14_12	14	12	Astra	13	4	9	8.5	0	0	0	0	1	1	L
p14_22	14_22	14	22	Astra	13	4	8	8.5	0	0	0	0	1	1	L
p18_26	18_26	18	26	Camlog	11	3.8	0	3	0	0	1	0	1	0	CL
p19_47	19_47	19	47	Frialit2	10	4.5	12	11.5	0	0	1	1	1	0	L
p21_23	21_23	21	23	Astra	15	5	7	0.04	0	0	1	1	2	0	E
p23_25	23_25	23	25	Straumann	12	4.1	0	3	0	0	0	0	1	0	CL
p24_14	24_14	24	14	Astra	11	5	0	17	0	1	0	1	1	0	CL
p25_36	25_36	25	36	Linkow	NA	NA	6	17	0	0	1	0	1	0	L
p27_46	27_46	27	46	Astra	11	4	6	3.67	0	0	1	0	1	1	L
p29_36	29_36	29	36	Astra	9	4	7	0.12	0	0	1	0	0	1	E
p31_21	31_21	31	21	Tübinger	15	4.5	7	13	1	0	1	0	1	1	L
p33_36	33_36	33	36	Astra	11	5	0	0.15	0	0	0	0	2	0	CE
p34_13	34_13	34	13	Astra	15	3.5	0	15	0	0	1	1	1	0	CL
p35_34	35_34	35	34	Astra	11	3.5	5	0.19	0	0	0	1	2	0	E
p35_42	35_42	35	42	Astra	11	3.5	5	0.19	0	0	0	1	2	0	E
p39_13	39_13	39	13	Astra	11	3.5	6	0.19	1	0	1	1	2	1	E
p41_16	41_16	41	16	Astra	11	5	0	0.25	0	0	1	0	2	0	CE
p42_26	42_26	42	26	Astra	11	4	6	6.5	0	0	1	0	1	0	L
p44_44	44_44	44	44	Astra	11	3.5	6	0.15	0	0	0	1	0	1	E
p46_25	46_25	46	25	Frialit2	11	4.5	9	23	0	1	1	1	1	1	L
p48_26	48_26	48	26	Astra	11	5	0	0.15	0	0	0	0	2	0	CE
p01_15	01_15	01	15	Camlog	11	5	0	0.19	0	0	0	0	2	0	CE
p49_14	49_14	49	14	Straumann	10	4.1	6	0.08	0	0	0	0	2	1	E
p51_46	51_46	51	46	Astra	6	4	5	0.21	0	1	1	0	2	0	E
p53_45	53_45	53	45	Astra	9	3.5	5	0.12	0	0	1	1	2	1	E
p55_46	55_46	55	46	Astra	11	4.5	6	0.1	0	1	1	1	2	1	E
p57_21	57_21	57	21	Astra	11	4	7	0.27	0	1	1	0	2	0	E
p59_46	59_46	59	46	Camlog	8	4	0	0.15	1	0	1	1	2	0	CE
p60_13	60_13	60	13	Astra	13	4.5	5	0.12	0	0	1	1	0	1	E
p62_27	62_27	62	27	Astra	11	4.5	0	0.19	0	0	0	0	2	1	CE
p63_24	63_24	63	24	Astra	11	4	7	0.23	0	0	1	0	0	1	E
p65_26	65_26	65	26	Camlog	13	5	0	0.17	0	0	1	1	2	1	CE
p66_44	66_44	66	44	Camlog	11	4.3	9	7	0	1	0	1	0	1	L
p68_12	68_12	68	12	Astra	17	4.5	0	0.27	0	0	1	0	2	0	CE
p69_21	69_21	69	21	Astra	15	4.5	5	0.23	0	0	1	1	2	1	CE
p70_36	70_36	70	36	Astra	13	5	0	0.15	0	0	0	0	1	0	CE
p71_32	71_32	71	32	Astra	15	3.5	11	22	0	0	1	0	0	1	L
p71_42	71_42	71	42	Astra	15	3.5	12	22	0	0	1	0	0	1	L
p75_16	75_16	75	16	Astra	11	5	0	0.15	0	0	0	1	2	0	CE
p76_14	76_14	76	14	Camlog	11	3.8	0	0.15	0	0	1	1	2	0	CE
p77_25	77_25	77	25	Astra	11	4.5	0	0.33	1	0	1	0	2	0	CE
p78_16	78_16	78	16	Xive	11	4.5	8	4.5	0	0	1	1	1	0	L
p80_16	80_16	80	16	Straumann	8	4.1	0	0.15	0	0	1	1	2	0	CE
p81_45	81_45	81	45	Frialit2	9	3.8	8	4	0	1	1	0	1	1	L
p83_24	83_24	83	24	Camlog	13	4.3	7	7	1	1	1	1	1	1	L
p02_16	02_16	02	16	Astra	11	4.5	5	0.25	0	1	1	0	0	1	E
p04_33	04_33	04	33	Astra	13	5	0	0.23	0	0	1	0	2	1	CE

## Sheet: Tabelle2
korsch_16817_14_s	16817_14	16817	14	Astra	0.21	0	0	1	0	1	0	Ce
korsch_18567_24_s	18567_24	18567	24	Astra	0.15	0	0	1	1	1	1	Ce
korsch_44773_36_s	44773_36	44773	36	Astra	0.15	0	0	0	0	1	0	Ce
korsch_53228_16_s	53228_16	53228	16	Astra	0.25	0	0	1	0	1	0	Ce
korsch_66256_26_s	66256_26	66256	26	Astra	0.15	0	0	0	0	1	0	Ce
korsch_6752_15_s	6752_15	6752	15	Camlog	0.19	0	0	0	0	1	0	Ce
korsch_70238_46_s	70238_46	70238	46	Camlog	0.15	1	0	1	1	1	0	Ce
korsch_71014_27_s	71014_27	71014	27	Astra	0.19	0	0	0	0	1	1	Ce
korsch_71103_26_s	71103_26	71103	26	Camlog	0.17	0	0	1	1	1	1	Ce
korsch_71693_12_s	71693_12	71693	12	Astra	0.27	0	0	1	0	1	0	Ce
korsch_71701_21_s	71701_21	71701	21	Astra	0.23	0	0	1	1	1	1	Ce
korsch_71720_36_s	71720_36	71720	36	Astra	0.15	0	0	0	0	0	0	Ce
korsch_71991_16_s	71991_16	71991	16	Astra	0.15	0	0	0	1	1	0	Ce
korsch_72038_14_s	72038_14	72038	14	Astra	0.15	0	0	1	1	1	0	Ce
korsch_72066_25_s	72066_25	72066	25	Astra	0.33	1	0	1	0	1	0	Ce
korsch_72524_16_s	72524_16	72524	16	Straumann	0.15	0	0	1	1	1	0	Ce
korsch_9135_33_s	9135_33	9135	33	Astra	0.23	0	0	1	0	1	1	Ce
korsch_18888_37_s	18888_37	18888	37	Astra	4.5	0	0	1	1	0	1	Cl
korsch_21794_26_s	21794_26	21794	26	Camlog	3	0	0	1	0	0	0	Cl
korsch_32663_25_s	32663_25	32663	25	Straumann	3	0	0	0	0	0	0	Cl
korsch_33740_14_s	33740_14	33740	14	Astra	17	0	1	0	1	0	0	Cl
korsch_46658_33_s	46658_33	46658	33	Astra	15	0	0	1	1	0	0	Cl
korsch_31085_23_s	31085_23	31085	23	Astra	0.04	0	0	1	1	1	0	E
korsch_41031_36_s	41031_36	41031	36	Astra	0.12	0	0	1	0	1	1	E
korsch_48905_34_s	48905_34	48905	34	Astra	0.19	0	0	0	1	1	0	E
korsch_48905_42_s	48905_42	48905	42	Astra	0.19	0	0	0	1	1	0	E
korsch_49081_13_s	49081_13	49081	13	Astra	0.19	1	0	1	1	1	1	E
korsch_61242_44_s	61242_44	61242	44	Astra	0.15	0	0	0	1	1	1	E
korsch_68828_14_s	68828_14	68828	14	Straumann	0.08	0	0	0	0	1	1	E
korsch_69555_46_s	69555_46	69555	46	Astra	0.21	0	1	1	0	1	0	E
korsch_69585_45_s	69585_45	69585	45	Astra	0.12	0	0	1	1	1	1	E
korsch_69911_46_s	69911_46	69911	46	Astra	0.1	0	1	1	1	1	1	E
korsch_69963_21_s	69963_21	69963	21	Astra	0.27	0	1	1	0	1	0	E
korsch_70432_13_s	70432_13	70432	13	Astra	0.12	0	0	1	1	1	1	E
korsch_71092_24_s	71092_24	71092	24	Astra	0.23	0	0	1	0	1	1	E
korsch_9002_16_s	9002_16	9002	16	Astra	0.25	0	1	1	0	1	1	E
korsch_12747_26_s	12747_26	12747	26	Astra	5.5	0	0	0	0	0	0	L
korsch_18567_27_s	18567_27	18567	27	Frialit2	22	0	0	1	1	0	1	L
korsch_18567_37_s	18567_37	18567	37	Frialit2	22	0	0	1	1	0	1	L
korsch_20389_12_s	20389_12	20389	12	Astra	8.5	0	0	0	0	0	1	L
korsch_20389_22_s	20389_22	20389	22	Astra	8.5	0	0	0	0	0	1	L
korsch_22978_47_s	22978_47	22978	47	Frialit2	11.5	0	0	1	1	0	0	L
korsch_36322_46_s	36322_46	36322	46	Astra	3.67	0	0	1	0	0	1	L
korsch_42681_21_s	42681_21	42681	21	Tübinger	13	1	0	1	0	0	1	L
korsch_54156_26_s	54156_26	54156	26	Astra	6.5	0	0	1	0	0	0	L
korsch_65183_25_s	65183_25	65183	25	Frialit2	23	0	1	1	1	0	1	L
korsch_71350_44_s	71350_44	71350	44	Camlog	7	0	1	0	1	1	1	L
korsch_71791_32_s	71791_32	71791	32	Astra	22	0	0	1	0	1	1	L
korsch_71791_42_s	71791_42	71791	42	Astra	22	0	0	1	0	1	1	L
korsch_72175_16_s	72175_16	72175	16	Xive	4.5	0	0	1	1	0	0	L
korsch_72933_45_s	72933_45	72933	45	Frialit2	4	0	1	1	0	0	1	L
korsch_72991_24_s	72991_24	72991	24	Camlog	7	1	1	1	1	0	1	L

## Sheet: Tabelle3
12747_26	12747
16817_14	16817
18567_24	18567
18567_27	18888
18567_37	20389
18888_37	21794
20389_12	22978
20389_22	31085
21794_26	32663
22978_47	33740
31085_23	34927
32663_25	36322
33740_14	41031
34927_36	42681
36322_46	44773
41031_36	46658
42681_21	48905
44773_36	49081
46658_33	53228
48905_34	54156
48905_42	61242
49081_13	65183
53228_16	66256
54156_26	6752
61242_44	68828
65183_25	69555
66256_26	69585
6752_15	69911
68828_14	69963
69555_46	70238
69585_45	70432
69911_46	71014
69963_21	71092
70238_46	71103
70432_13	71350
71014_27	71693
71092_24	71701
71103_26	71720
71350_44	71791
71693_12	71991
71701_21	72038
71720_36	72066
71791_32	72175
71791_42	72524
71991_16	72933
72038_14	72991
72066_25	9002
72175_16	9135
72524_16
72933_45
72991_24
9002_16
9135_33
